# Supplementary material for: High-Throughput Sequencing of Gastric Cancer Patients: Unravelling Genetic Predispositions Towards an Early-Onset Subtype
Source: PubMed Central journal article supplement (PMC7409326; doi:10.3390/cancers12071981), 2020-07-21
Supplement: cancers-12-01981-s001.pdf [file cancers-12-01981-s001.pdf]

# High-Throughput Sequencing of Gastric Cancer Patients: Unravelling Genetic Predispositions Towards an Early-Onset Subtype

Julita Machlowska, Przemysław Kapusta, Jacek Baj, Folkert H. M. Morsink, Paweł Wołkow, Ryszard Maciejewski, G. Johan A. Offerhaus and Robert Sitarz

**Table S1.** Clinical characteristics of the studied group.

| Patient ID | Age of Onset | Age-Dependent Subtype | Histology  | Family History | CDH1 Mutation Status (dbSNP)                | Treatment Strategy |
|------------|--------------|-----------------------|------------|----------------|---------------------------------------------|--------------------|
| 1          | >45          | CGC                   | Intestinal | Negative       | rs1801552, rs9929218                        | Surgical resection |
| 2          | >45          | CGC                   | Intestinal | Negative       | rs1801552                                   | Surgical resection |
| 5          | >45          | CGC                   | Intestinal | Negative       | rs1801552                                   | Surgical resection |
| 7          | >45          | CGC                   | Intestinal | Negative       | rs1801552                                   | Surgical resection |
| 10         | >45          | CGC                   | Intestinal | Negative       | rs1801552                                   | Surgical resection |
| 17         | >45          | CGC                   | Intestinal | Negative       | rs33969373, rs1801552, rs2229044, rs9929218 | Surgical resection |
| 21         | >45          | CGC                   | Intestinal | Negative       | rs1801552                                   | Surgical resection |
| 22         | >45          | CGC                   | Intestinal | Negative       | rs1801552, rs33964119                       | Surgical resection |
| 26         | >45          | CGC                   | Intestinal | Negative       | rs1801552, rs9929218                        | Surgical resection |
| 31         | >45          | CGC                   | Intestinal | Negative       | rs1801552, rs9929218                        | Surgical resection |
| 35         | >45          | CGC                   | Intestinal | Negative       | rs1801552, rs9929218                        | Surgical resection |
| 37         | >45          | CGC                   | Intestinal | Negative       | rs35741240, rs1801552                       | Surgical resection |
| 45         | >45          | CGC                   | Intestinal | Negative       | rs1801552, rs9929218                        | Surgical resection |
| 63N        | >45          | CGC                   | Intestinal | Negative       | rs1801552, rs9929218                        | Surgical resection |
| 72         | >45          | CGC                   | Intestinal | Negative       | rs1801552                                   | Surgical resection |
| 82         | >45          | CGC                   | Intestinal | Negative       | rs1801552                                   | Surgical resection |
| 84         | >45          | CGC                   | Intestinal | Negative       | rs1801552                                   | Surgical resection |
| 91N        | >45          | CGC                   | Diffuse    | Negative       | rs1801552                                   | Surgical resection |
| Y3         | ≤45          | EOGC                  | Diffuse    | Negative       | rs1801552                                   | Surgical resection |
| Y68        | ≤45          | EOGC                  | Diffuse    | Negative       | rs9929218                                   | Surgical resection |
| Y77        | ≤45          | EOGC                  | Diffuse    | Negative       | rs1801552, rs9929218                        | Surgical resection |
| Y88        | ≤45          | EOGC                  | Diffuse    | Negative       | rs761309816                                 | Surgical resection |
| Y102       | ≤45          | EOGC                  | Diffuse    | Negative       | rs1801552                                   | Surgical resection |
| Y103       | ≤45          | EOGC                  | Diffuse    | Negative       | rs1801552, rs9929218                        | Surgical resection |

|       |     |      |         |          |                                               |                    |
|-------|-----|------|---------|----------|-----------------------------------------------|--------------------|
| Y104  | ≤45 | EOGC | Diffuse | Negative | rs761309816, rs1801552, rs61747636, rs9929218 | Surgical resection |
| Y105  | ≤45 | EOGC | Diffuse | Negative | Negative                                      | Surgical resection |
| Y109B | ≤45 | EOGC | Diffuse | Negative | rs1801552                                     | Surgical resection |
| Y110B | ≤45 | EOGC | Diffuse | Negative | rs1801552                                     | Surgical resection |
| Y115B | ≤45 | EOGC | Diffuse | Negative | rs1801552                                     | Surgical resection |
| Y123B | ≤45 | EOGC | Diffuse | Negative | rs1801552, rs9929218                          | Surgical resection |
| Y128B | ≤45 | EOGC | Diffuse | Negative | rs1801552                                     | Surgical resection |
| Y132B | ≤45 | EOGC | Diffuse | Negative | rs1801023, rs9929218                          | Surgical resection |
| Y134B | ≤45 | EOGC | Diffuse | Negative | rs1801552, rs9929218                          | Surgical resection |
| Y135  | ≤45 | EOGC | Diffuse | Negative | rs1801552                                     | Surgical resection |
| Y137B | ≤45 | EOGC | Diffuse | Negative | Negative                                      | Surgical resection |
| Y143C | ≤45 | EOGC | Diffuse | Negative | rs1801552, rs9929218                          | Surgical resection |
| Y144C | ≤45 | EOGC | Diffuse | Negative | rs1801552                                     | Surgical resection |
| Y145B | ≤45 | EOGC | Diffuse | Negative | rs1801552, rs9929218                          | Surgical resection |
| Y146B | ≤45 | EOGC | Diffuse | Negative | rs1801025, rs1801552                          | Surgical resection |
| Y147C | ≤45 | EOGC | Diffuse | Negative | rs1801552                                     | Surgical resection |
| Y148C | ≤45 | EOGC | Diffuse | Negative | Negative                                      | Surgical resection |
| Y151B | ≤45 | EOGC | Diffuse | Negative | rs1801552, rs9929218                          | Surgical resection |
| Y159C | ≤45 | EOGC | Diffuse | Negative | rs1801552                                     | Surgical resection |
| Y161C | ≤45 | EOGC | Diffuse | Negative | rs1801552, rs9929218                          | Surgical resection |
| Y162C | ≤45 | EOGC | Diffuse | Negative | rs1801552, rs9929218                          | Surgical resection |
| Y165B | ≤45 | EOGC | Diffuse | Negative | Negative                                      | Surgical resection |
| Y167B | ≤45 | EOGC | Diffuse | Negative | rs1801552                                     | Surgical resection |
| Y168C | ≤45 | EOGC | Diffuse | Negative | rs1801552                                     | Surgical resection |
| Y169C | ≤45 | EOGC | Diffuse | Negative | rs1801552, rs9929218                          | Surgical resection |
| Y179F | ≤45 | EOGC | Diffuse | Negative | rs1801552, rs9929218                          | Surgical resection |
| Y183B | ≤45 | EOGC | Diffuse | Negative | rs1801552, rs9929218                          | Surgical resection |
| Y188B | ≤45 | EOGC | Diffuse | Negative | rs1801552, rs9929218                          | Surgical resection |
| Y199B | ≤45 | EOGC | Diffuse | Negative | rs35741240, rs1801552                         | Surgical resection |

**Table S2.** *In silico* estimation of *CDH1* mutations status among GC patients.

| dbSNP | Variant Type | Chr | CADD Score (Scaled) | DANN Score | FATHMM-XF Prediction | SIFT Prediction | PROVEAN Prediction | gnomAD MAF (European) |
|-------|--------------|-----|---------------------|------------|----------------------|-----------------|--------------------|-----------------------|
|-------|--------------|-----|---------------------|------------|----------------------|-----------------|--------------------|-----------------------|

|             |                             |    |       |        |                     |           |         | <b>Non-Finnish</b> |
|-------------|-----------------------------|----|-------|--------|---------------------|-----------|---------|--------------------|
| rs1801552   | synonymous                  | 16 | 5.661 | 0.4494 | Benign (high conf.) | Tolerated | Neutral | 0.6252             |
| rs9929218   | intron_variant              | 16 | 2.120 | 0.6168 | Benign (high conf.) | NA        | NA      | 0.2859             |
| rs33969373  | synonymous                  | 16 | 0.549 | 0.8224 | Benign (high conf.) | Tolerated | Neutral | 0.007797           |
| rs2229044   | synonymous                  | 16 | 7.155 | 0.7629 | Benign (high conf.) | Tolerated | Neutral | 0.007156           |
| rs33964119  | synonymous                  | 16 | 1.320 | 0.8216 | Benign (high conf.) | Tolerated | Neutral | 0.02579            |
| rs35741240  | synonymous                  | 16 | 0.029 | 0.6151 | Benign (high conf.) | Tolerated | Neutral | 0.004466           |
| rs761309816 | disruptive_inframe_deletion | 16 | NA    | NA     | NA                  | NA        | NA      | NA                 |
| rs61747636  | synonymous                  | 16 | 8.601 | 0.785  | Benign (high conf.) | Tolerated | Neutral | 0.002268           |
| rs1801023   | synonymous                  | 16 | 1.198 | 0.5807 | Benign (high conf.) | Tolerated | Neutral | 0.004145           |
| rs1801025   | synonymous                  | 16 | 7.508 | 0.9873 | Benign              | Tolerated | Neutral | 0.0007044          |

NA: not applicable.

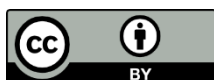

© 2020 by the authors. Submitted for possible open access publication under the terms and conditions of the Creative Commons Attribution (CC BY) license (<http://creativecommons.org/licenses/by/4.0/>).
